# Supplementary material for: New Biological Insights Into How Deforestation in Amazonia Affects Soil Microbial Communities Using Metagenomics and Metagenome-Assembled Genomes
Source: PubMed Central journal article supplement (PMC6064768; doi:10.3389/fmicb.2018.01635), 2018-07-23
Supplement: Image_6.pdf [file Image_6.pdf]

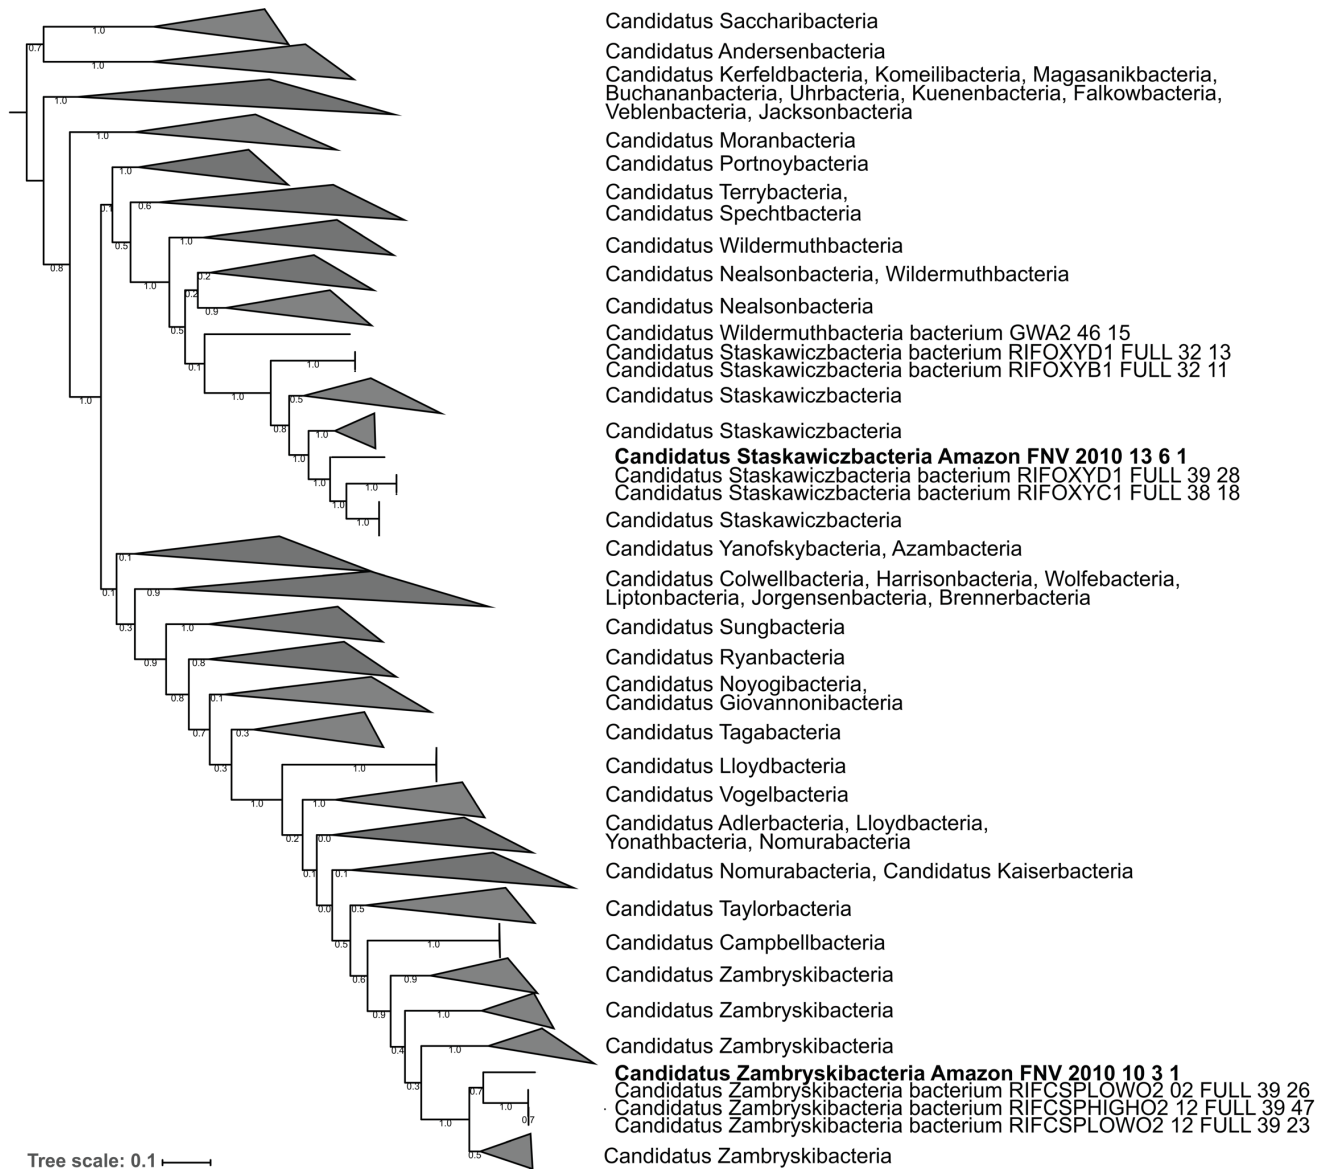

**FIGURE S6** Maximum likelihood phylogenetic tree of 16 concatenated ribosomal proteins from superphylum Parcubacteria with Candidatus Saccharibacteria (TM7) as an outgroup, with 500 bootstrap replicates. The genomes from this study are indicated in bold. The numbers on each node represent the bootstrap support.
