# Supplementary material for: New Biological Insights Into How Deforestation in Amazonia Affects Soil Microbial Communities Using Metagenomics and Metagenome-Assembled Genomes
Source: Front Microbiol. 2018 Jul 23;9:1635. doi: 10.3389/fmicb.2018.01635 (PMC6064768; doi:10.3389/fmicb.2018.01635)
Supplement: Supplementary file 9 [file Table_3.XLSX]

## Sheet: TABLE S3
Supplementary Table 3: Results from a MANOVA test of geochemical data from 2010 soil cores (p<0.1 . , p<0.05*, p<0.01 **). H.Al = total soil acidity. SB = sum of exchangable bases (Ca + Mg + K). CTC = cation exchange capacity. m = aluminum saturation. mmolc = millimoles of charge
	Mean Forest	Mean Pasture	P-value (MANOVA test)
Organic Matter (mg/g)	24.22	36	0.0386	*
Phosphorus (mg/l)	6.56	7.56	0.6344
Sulfur (mg/l)	9.67	8.33	0.0282	*
Potassium (mmolc/l)	1.53	2.03	0.351
Calcium (mmolc/l)	19	17.67	0.8598
Magnesium (mmolc/l)	7.78	4.89	0.2493
Aluminum (mg/l)	1.89	1.23	0.2882
Boron (mg/l)	0.202	0.178	0.0754	.
Copper (mg/l)	0.944	2.67	0.0454	*
Iron (mg/l)	45.44	99.88	0.0087	**
Manganese (mg/l)	46.62	92.21	0.15
Zinc (mg/l)	2.91	5.5	0.3088
pH	4.4	4.74	0.1544
H.Al (mmolc/l)	24	25.67	0.6373
SB (mmolc/l)	28.31	24.71	0.7214
CTC (mmolc/l)	52.31	50.38	0.8646
m (%)	47.78	45.44	0.7652
