# Supplementary material for: New Biological Insights Into How Deforestation in Amazonia Affects Soil Microbial Communities Using Metagenomics and Metagenome-Assembled Genomes
Source: Front Microbiol. 2018 Jul 23;9:1635. doi: 10.3389/fmicb.2018.01635 (PMC6064768; doi:10.3389/fmicb.2018.01635)
Supplement: Supplementary file 17 [file Table_11.XLSX]

## Sheet: TABLE S10
Supplemental Table 11: Microgenomates MAGs with DNA mistmach repair genes mutS/mutL (n=859) as annotated by the PATRIC database.
Genome	Genome ID	Accession	PATRIC ID	Feature ID	Start	End	Length	Strand	FIGfam ID	AA Length	Gene Symbol	Product
unclassified Microgenomates Bin_10_5_1	1.04698e+06	1046980.3.con.0014	fig|1046980.3.peg.194	PATRIC.1046980.3.1046980.3.con.0014.CDS.27577.30270.fwd	27577	30270	2694	+	FIG00000356	897		DNA mismatch repair protein MutS
unclassified Microgenomates Bin_10_8_1	1.04698e+06	1046980.5.con.0005	fig|1046980.5.peg.371	PATRIC.1046980.5.1046980.5.con.0005.CDS.59904.62564.rev	59904	62564	2661	-	FIG00000356	886		DNA mismatch repair protein MutS
Microgenomates bacterium OLB22	1.61743e+06	LLEV01000008	fig|1617428.3.peg.514	PATRIC.1617428.3.LLEV01000008.CDS.3620.5008.fwd	3620	5008	1389	+	FIG00000356	462	mutS_1	DNA mismatch repair protein MutS
Microgenomates bacterium OLB22	1.61743e+06	LLEV01000008	fig|1617428.3.peg.515	PATRIC.1617428.3.LLEV01000008.CDS.4996.6042.fwd	4996	6042	1047	+	FIG00000356	348	mutS_2	DNA mismatch repair protein MutS
unclassified Microgenomates group Bin_13_2_2	1.79484e+06	1794839.3.con.0020	fig|1794839.3.peg.882	PATRIC.1794839.3.1794839.3.con.0020.CDS.25693.28095.rev	25693	28095	2403	-	FIG00000356	800		DNA mismatch repair protein MutS
unclassified Microgenomates group Bin_10_14	1.79484e+06	1794839.4.con.0038	fig|1794839.4.peg.454	PATRIC.1794839.4.1794839.4.con.0038.CDS.121.2772.fwd	121	2772	2652	+	FIG00000356	883		DNA mismatch repair protein MutS
unclassified Microgenomates group Bin_13_2_2	1.79484e+06	1794839.5.con.0020	fig|1794839.5.peg.882	PATRIC.1794839.5.1794839.5.con.0020.CDS.25693.28095.rev	25693	28095	2403	-	FIG00000356	800		DNA mismatch repair protein MutS
unclassified Microgenomates group Bin_10_14	1.79484e+06	1794839.6.con.0038	fig|1794839.6.peg.454	PATRIC.1794839.6.1794839.6.con.0038.CDS.121.2772.fwd	121	2772	2652	+	FIG00000356	883		DNA mismatch repair protein MutS
Candidatus Roizmanbacteria bacterium RIFCSPHIGHO2_02_FULL_43_11	1.80204e+06	MFZT01000042	fig|1802043.3.peg.638	PATRIC.1802043.3.MFZT01000042.CDS.754.3303.rev	754	3303	2550	-	FIG00000356	849		DNA mismatch repair protein MutS
Candidatus Roizmanbacteria bacterium RIFCSPHIGHO2_12_FULL_42_10	1.80205e+06	MGAD01000021	fig|1802053.3.peg.314	PATRIC.1802053.3.MGAD01000021.CDS.3348.5282.fwd	3348	5282	1935	+	FIG00000356	645		DNA mismatch repair protein MutS
Candidatus Roizmanbacteria bacterium RIFCSPLOWO2_02_FULL_43_10	1.80208e+06	MGBC01000006	fig|1802078.3.peg.101	PATRIC.1802078.3.MGBC01000006.CDS.18832.19377.rev	18832	19377	546	-	FIG00000356	181		DNA mismatch repair protein MutS
Candidatus Roizmanbacteria bacterium RIFCSPLOWO2_02_FULL_43_10	1.80208e+06	MGBC01000006	fig|1802078.3.peg.102	PATRIC.1802078.3.MGBC01000006.CDS.19374.21059.rev	19374	21059	1686	-	FIG00000356	561		DNA mismatch repair protein MutS
Candidatus Woesebacteria bacterium RIFCSPHIGHO2_01_FULL_41_10	1.8025e+06	MGGM01000009	fig|1802500.3.peg.200	PATRIC.1802500.3.MGGM01000009.CDS.3376.5982.rev	3376	5982	2607	-	FIG00000356	868		DNA mismatch repair protein MutS
Candidatus Woesebacteria bacterium RIFCSPHIGHO2_12_FULL_44_11	1.80251e+06	MGGY01000036	fig|1802512.3.peg.1013	PATRIC.1802512.3.MGGY01000036.CDS.1017.2939.fwd	1017	2939	1923	+	FIG00000356	640		DNA mismatch repair protein MutS
Candidatus Woesebacteria bacterium RIFCSPHIGHO2_12_FULL_44_11	1.80251e+06	MGGY01000036	fig|1802512.3.peg.1014	PATRIC.1802512.3.MGGY01000036.CDS.2936.3496.fwd	2936	3496	561	+	FIG00000356	186		DNA mismatch repair protein MutS
Candidatus Pacebacteria bacterium UBA6180	1.95331e+06	DITQ01000001	fig|1953305.3.peg.805	PATRIC.1953305.3.DITQ01000001.CDS.109094.113686.fwd	109094	113686	4593	+		1530		DNA mismatch repair protein MutS
Candidatus Roizmanbacteria bacterium UBA1450	1.95331e+06	DCTC01000001	fig|1953308.3.peg.588	PATRIC.1953308.3.DCTC01000001.CDS.629931.632504.fwd	629931	632504	2574	+	FIG00000356	857		DNA mismatch repair protein MutS
Candidatus Woesebacteria bacterium UBA5941	1.95339e+06	DJCV01000011	fig|1953389.3.peg.562	PATRIC.1953389.3.DJCV01000011.CDS.82502.85087.fwd	82502	85087	2586	+	FIG00000356	861		DNA mismatch repair protein MutS
Candidatus Woesebacteria bacterium UBA5947	1.95339e+06	DJCP01000006	fig|1953390.3.peg.173	PATRIC.1953390.3.DJCP01000006.CDS.15097.17682.fwd	15097	17682	2586	+	FIG00000356	861		DNA mismatch repair protein MutS
Candidatus Pacebacteria bacterium CG_4_10_14_0_2_um_filter_40_20	1.97476e+06	PFOQ01000012	fig|1974758.3.peg.382	PATRIC.1974758.3.PFOQ01000012.CDS.11536.14124.rev	11536	14124	2589	-	FIG00000356	862		DNA mismatch repair protein MutS
Candidatus Pacebacteria bacterium CG_4_9_14_0_2_um_filter_40_15	1.97476e+06	PFRS01000005	fig|1974764.3.peg.1030	PATRIC.1974764.3.PFRS01000005.CDS.372311.374899.rev	372311	374899	2589	-	FIG00000356	862		DNA mismatch repair protein MutS
Candidatus Pacebacteria bacterium CG_4_9_14_3_um_filter_40_12	1.97477e+06	PFWC01000011	fig|1974765.3.peg.387	PATRIC.1974765.3.PFWC01000011.CDS.172923.175511.fwd	172923	175511	2589	+	FIG00000356	862		DNA mismatch repair protein MutS
Candidatus Pacebacteria bacterium CG10_big_fil_rev_8_21_14_0_10_40_26	1.97477e+06	PFDF01000009	fig|1974767.3.peg.273	PATRIC.1974767.3.PFDF01000009.CDS.11063.13651.rev	11063	13651	2589	-	FIG00000356	862		DNA mismatch repair protein MutS
unclassified Microgenomates Bin_10_5_1	1.04698e+06	1046980.3.con.0014	fig|1046980.3.peg.195	PATRIC.1046980.3.1046980.3.con.0014.CDS.30319.31986.fwd	30319	31986	1668	+	FIG00000380	555		DNA mismatch repair protein MutL
unclassified Microgenomates Bin_10_8_1	1.04698e+06	1046980.5.con.0005	fig|1046980.5.peg.368	PATRIC.1046980.5.1046980.5.con.0005.CDS.55737.57392.rev	55737	57392	1656	-	FIG00000380	551		DNA mismatch repair protein MutL
Microgenomates bacterium OLB22	1.61743e+06	LLEV01000008	fig|1617428.3.peg.516	PATRIC.1617428.3.LLEV01000008.CDS.6142.7815.fwd	6142	7815	1674	+	FIG00000380	557	mutL	DNA mismatch repair protein MutL
unclassified Microgenomates group Bin_13_2_2	1.79484e+06	1794839.3.con.0020	fig|1794839.3.peg.881	PATRIC.1794839.3.1794839.3.con.0020.CDS.23992.25680.rev	23992	25680	1689	-	FIG00000380	562		DNA mismatch repair protein MutL
unclassified Microgenomates group Bin_10_14	1.79484e+06	1794839.4.con.0038	fig|1794839.4.peg.456	PATRIC.1794839.4.1794839.4.con.0038.CDS.3039.4700.fwd	3039	4700	1662	+	FIG00000380	553		DNA mismatch repair protein MutL
unclassified Microgenomates group Bin_13_2_2	1.79484e+06	1794839.5.con.0020	fig|1794839.5.peg.881	PATRIC.1794839.5.1794839.5.con.0020.CDS.23992.25680.rev	23992	25680	1689	-	FIG00000380	562		DNA mismatch repair protein MutL
unclassified Microgenomates group Bin_10_14	1.79484e+06	1794839.6.con.0038	fig|1794839.6.peg.456	PATRIC.1794839.6.1794839.6.con.0038.CDS.3039.4700.fwd	3039	4700	1662	+	FIG00000380	553		DNA mismatch repair protein MutL
Candidatus Roizmanbacteria bacterium RIFCSPHIGHO2_02_FULL_43_11	1.80204e+06	MFZT01000014	fig|1802043.3.peg.182	PATRIC.1802043.3.MFZT01000014.CDS.3.932.fwd	3	932	930	+	FIG00000380	309		DNA mismatch repair protein MutL
Candidatus Roizmanbacteria bacterium RIFCSPHIGHO2_02_FULL_43_11	1.80204e+06	MFZT01000042	fig|1802043.3.peg.637	PATRIC.1802043.3.MFZT01000042.CDS.362.757.rev	362	757	396	-	FIG00000380	131		DNA mismatch repair protein MutL
Candidatus Roizmanbacteria bacterium RIFCSPLOWO2_02_FULL_43_10	1.80208e+06	MGBC01000006	fig|1802078.3.peg.99	PATRIC.1802078.3.MGBC01000006.CDS.17215.18423.rev	17215	18423	1209	-	FIG00000380	402		DNA mismatch repair protein MutL
Candidatus Roizmanbacteria bacterium RIFCSPLOWO2_02_FULL_43_10	1.80208e+06	MGBC01000006	fig|1802078.3.peg.100	PATRIC.1802078.3.MGBC01000006.CDS.18440.18835.rev	18440	18835	396	-	FIG00000380	131		DNA mismatch repair protein MutL
Candidatus Woesebacteria bacterium RIFCSPHIGHO2_01_FULL_41_10	1.8025e+06	MGGM01000009	fig|1802500.3.peg.199	PATRIC.1802500.3.MGGM01000009.CDS.1713.3386.rev	1713	3386	1674	-	FIG00000380	557		DNA mismatch repair protein MutL
Candidatus Woesebacteria bacterium RIFCSPHIGHO2_12_FULL_44_11	1.80251e+06	MGGY01000036	fig|1802512.3.peg.1015	PATRIC.1802512.3.MGGY01000036.CDS.4047.5081.fwd	4047	5081	1035	+	FIG00000380	345		DNA mismatch repair protein MutL
Candidatus Roizmanbacteria bacterium UBA1450	1.95331e+06	DCTC01000001	fig|1953308.3.peg.589	PATRIC.1953308.3.DCTC01000001.CDS.632515.634206.fwd	632515	634206	1692	+	FIG00000380	563		DNA mismatch repair protein MutL
Candidatus Woesebacteria bacterium UBA5941	1.95339e+06	DJCV01000011	fig|1953389.3.peg.563	PATRIC.1953389.3.DJCV01000011.CDS.85080.86738.fwd	85080	86738	1659	+	FIG00000380	552		DNA mismatch repair protein MutL
Candidatus Woesebacteria bacterium UBA5947	1.95339e+06	DJCP01000006	fig|1953390.3.peg.174	PATRIC.1953390.3.DJCP01000006.CDS.17675.19333.fwd	17675	19333	1659	+	FIG00000380	552		DNA mismatch repair protein MutL
Candidatus Pacebacteria bacterium CG_4_10_14_0_2_um_filter_40_20	1.97476e+06	PFOQ01000012	fig|1974758.3.peg.381	PATRIC.1974758.3.PFOQ01000012.CDS.9849.11534.rev	9849	11534	1686	-	FIG00000380	561		DNA mismatch repair protein MutL
Candidatus Pacebacteria bacterium CG_4_10_14_0_8_um_filter_43_12	1.97476e+06	PFLO01000039	fig|1974760.3.peg.18	PATRIC.1974760.3.PFLO01000039.CDS.13675.15366.rev	13675	15366	1692	-	FIG00000380	563		DNA mismatch repair protein MutL
Candidatus Pacebacteria bacterium CG_4_9_14_0_2_um_filter_40_15	1.97476e+06	PFRS01000005	fig|1974764.3.peg.1029	PATRIC.1974764.3.PFRS01000005.CDS.370624.372309.rev	370624	372309	1686	-	FIG00000380	561		DNA mismatch repair protein MutL
Candidatus Pacebacteria bacterium CG_4_9_14_3_um_filter_40_12	1.97477e+06	PFWC01000011	fig|1974765.3.peg.388	PATRIC.1974765.3.PFWC01000011.CDS.175513.177198.fwd	175513	177198	1686	+	FIG00000380	561		DNA mismatch repair protein MutL
Candidatus Pacebacteria bacterium CG10_big_fil_rev_8_21_14_0_10_40_26	1.97477e+06	PFDF01000009	fig|1974767.3.peg.272	PATRIC.1974767.3.PFDF01000009.CDS.9376.11061.rev	9376	11061	1686	-	FIG00000380	561		DNA mismatch repair protein MutL
Candidatus Pacebacteria bacterium CG10_big_fil_rev_8_21_14_0_10_44_11	1.97477e+06	PFDH01000027	fig|1974769.3.peg.617	PATRIC.1974769.3.PFDH01000027.CDS.1083.2774.fwd	1083	2774	1692	+	FIG00000380	563		DNA mismatch repair protein MutL
Microgenomates Bin 28 9	336362	336362.3.con.0019	fig|336362.3.peg.293	PATRIC.336362.3.336362.3.con.0019.CDS.4242.5936.rev	4242	5936	1695	-	FIG00000380	564		DNA mismatch repair protein MutL
Microgenomates Bin 28 9	336362	336362.3.con.0019	fig|336362.3.peg.294	PATRIC.336362.3.336362.3.con.0019.CDS.5938.6621.rev	5938	6621	684	-	FIG00000356	227		DNA mismatch repair protein MutS
Microgenomates Bin 28 9	336362	336362.3.con.0044	fig|336362.3.peg.742	PATRIC.336362.3.336362.3.con.0044.CDS.11238.12083.fwd	11238	12083	846	+	FIG00000356	282		DNA mismatch repair protein MutS
